# Supplementary material for: Actigraphy-Derived Sleep Is Associated with Eating Behavior Characteristics
Source: PubMed Central journal article supplement (PMC8001707; doi:10.3390/nu13030852), 2021-03-05
Supplement: nutrients-13-00852-s001.pdf [file nutrients-13-00852-s001.pdf]

## SUPPLEMENTARY MATERIAL

### Actigraphy-derived sleep is associated with eating behavior characteristics

Rocío Barragán, Faris M. Zuraikat, Victoria Tam, Samantha Scaccia, Justin Cochran, Si Li, Bin Cheng and Marie-Pierre St-Onge

**Table S1. Baseline descriptive characteristics of the overall analytic sample and by BMI.**

| Characteristic                    | BMI<25 (N = 63) | BMI≥25 (N = 116) | Total (N = 179) | P-value      |
|-----------------------------------|-----------------|------------------|-----------------|--------------|
| <b>Demographic</b>                |                 |                  |                 |              |
| Age (years)                       |                 |                  |                 |              |
| Mean ± SD                         | 32.3 ± 11.9     | 37.6 ± 13.4      | 35.7 ± 13.1     | <b>0.009</b> |
| Range                             | 19.0 - 65.0     | 19.0 - 73.0      | 19.0 - 73.0     |              |
| Sex                               |                 |                  |                 |              |
| Female                            | 48 (76.2%)      | 75 (64.7%)       | 123 (68.7%)     | 0.112        |
| Male                              | 15 (23.8%)      | 41 (35.3%)       | 56 (31.3%)      |              |
| Race/Ethnicity                    |                 |                  |                 |              |
| White/Non-Hispanic                | 49 (77.8%)      | 81 (69.8%)       | 130 (72.6%)     | 0.255        |
| Non-white/Hispanic                | 14 (22.2%)      | 35 (30.2%)       | 49 (27.4%)      |              |
| Education                         |                 |                  |                 |              |
| < College degree                  | 24 (38.1%)      | 34 (29.3%)       | 58 (32.4%)      | 0.230        |
| ≥ College degree                  | 39 (61.9%)      | 82 (70.7%)       | 121 (67.6%)     |              |
| <b>Health and Sleep Behaviors</b> |                 |                  |                 |              |
| Sleep duration                    |                 |                  |                 |              |
| Mean ± SD                         | 435.8 ± 45.1    | 422.4 ± 48.2     | 427.1 ± 47.4    | 0.070        |
| Range                             | 316.9 - 553.1   | 204.9 - 527.4    | 204.9 - 553.1   |              |
| Bedtime                           |                 |                  |                 |              |
| Mean ± SD                         | 23:41 ± 1:04    | 1:03 ± 5:13      | 1:09 ± 5:24     | <b>0.007</b> |
| Range                             | 20:10 - 2:06    | 21:56 - 2:49     | 20:10 - 2:40    |              |
| Waketime                          |                 |                  |                 |              |
| Mean ± SD                         | 7:55 ± 1:10     | 7:55 ± 1:14      | 7:55 ± 1:13     | 0.625        |
| Range                             | 4:57 - 10:40    | 3:57 - 11:03     | 3:57 - 11:03    |              |
| Midpoint of sleep                 |                 |                  |                 |              |
| Mean ± SD                         | 3:59 ± 00:58    | 4:01 ± 0:59      | 4:01 ± 0:59     | 0.311        |
| Range                             | 1:23 - 6:25     | 1:51 - 6:59      | 1:23 - 6:59     |              |
| Sleep efficiency (%)              |                 |                  |                 |              |

|                               |              |              |              |              |
|-------------------------------|--------------|--------------|--------------|--------------|
| Mean ± SD                     | 89.0 ± 6.0   | 87.4 ± 6.0   | 87.9 ± 6.0   | 0.090        |
| Range                         | 67.5 - 97.1  | 67.0 - 97.0  | 67.0 - 97.1  |              |
| Wake after sleep onset (min)  |              |              |              |              |
| Mean ± SD                     | 49.5 ± 29.1  | 54.8 ± 27.8  | 53.0 ± 28.6  | 0.234        |
| Range                         | 13.3 - 175.8 | 10.3 - 169.6 | 10.3 - 175.8 |              |
| Sleep fragmentation index     |              |              |              |              |
| Mean ± SD                     | 26.3 ± 8.8   | 27.4 ± 8.2   | 27.0 ± 8.4   | 0.369        |
| Range                         | 10.8 - 54.7  | 8.1 - 52.5   | 8.1 - 54.7   |              |
| Sleep duration SD             |              |              |              |              |
| Mean ± SD                     | 53.3 ± 27.1  | 51.2 ± 31.4  | 51.9 ± 29.9  | 0.650        |
| Range                         | 12.6 - 140.6 | 4.0 - 201.2  | 4.0 - 201.2  |              |
| Bedtime SD                    |              |              |              |              |
| Mean ± SD                     | 60.8 ± 31.1  | 60.8 ± 37.3  | 60.8 ± 35.2  | 0.994        |
| Range                         | 20.3 - 174.1 | 0.0 - 240.0  | 0.0 - 240.0  |              |
| <b>Eating Behavior Traits</b> |              |              |              |              |
| Dietary restraint             |              |              |              |              |
| Mean ± SD                     | 6.5 ± 3.7    | 8.1 ± 4.1    | 7.5 ± 4.0    | <b>0.015</b> |
| Range                         | 0.0 - 16.0   | 0.0 - 19.0   | 0.0 - 19.0   |              |
| Disinhibition                 |              |              |              |              |
| Mean ± SD                     | 3.1 ± 2.3    | 4.0 ± 2.8    | 3.7 ± 2.7    | <b>0.042</b> |
| Range                         | 0.0 - 10.0   | 0.0 - 13.0   | 0.0 - 13.0   |              |
| Tendency towards hunger       |              |              |              |              |
| Mean ± SD                     | 2.9 ± 1.8    | 3.1 ± 2.6    | 3.0 ± 2.4    | 0.596        |
| Range                         | 0.0 - 10.0   | 0.0 - 13.0   | 0.0 - 13.0   |              |

Values are mean±SD for continuous variables and count (%) for categorical variables. BMI: body mass index; P-value for the comparisons (means or %) between BMI≥25 kg/m<sup>2</sup> and BMI<25 kg/m<sup>2</sup>. Student's t test was used to compare continuous variables and Chi squared tests were used to compare categorical variables.
